# Supplementary material
Source: PubMed Central journal article supplement (PMC4031941)
Supplement: supp_M045807_jlr.M045807-1.pdf [file supp_M045807_jlr.M045807-1.pdf]

**Supplemental Table 1.** The selected genes involved in fatty acid, glucose, and cholesterol metabolism in lipid-loaded HepG2 cells treated with linalool (LN) and fenofibrate (FF)

| Gene symbol                  | Gene description                                                                                  | Group (fold of control) |      |
|------------------------------|---------------------------------------------------------------------------------------------------|-------------------------|------|
|                              |                                                                                                   | LN                      | FF   |
| <i>Fatty acid metabolism</i> |                                                                                                   |                         |      |
| <i>Elovl3</i>                | Elongation of very long chain fatty acids protein 3                                               | 0.63                    | 0.87 |
| <i>Ppara</i>                 | Peroxisome proliferator-activated receptor alpha                                                  | 1.41                    | 1.98 |
| <i>Aldh6a1</i>               | Methylmalonate-semialdehyde dehydrogenase                                                         | 1.19                    | 1.61 |
| <i>Srebp-1c</i>              | Sterol regulatory element-binding protein 1c                                                      | 0.92                    | 0.63 |
| <i>Acadvl</i>                | Very-long-chain specific acyl-CoA dehydrogenase, mitochondrial precursor                          | 1.19                    | 2.58 |
| <i>Echs1</i>                 | Enoyl-CoA hydratase, mitochondrial precursor                                                      | 1.55                    | 1.64 |
| <i>Acox1</i>                 | Acyl-coenzyme A oxidase 1, peroxisomal (Palmitoyl-CoA oxidase)                                    | 1.19                    | 1.73 |
| <i>Acaal</i>                 | 3-ketoacyl-CoA thiolase, peroxisomal precursor (Acetyl-CoA acyltransferase)                       | 1.41                    | 1.80 |
| <i>Acat1</i>                 | Acetyl-CoA acetyltransferase, mitochondrial precursor                                             | 1.27                    | 2.00 |
| <i>Acadm</i>                 | Medium-chain specific acyl-CoA dehydrogenase, mitochondrial precursor                             | 1.46                    | 2.39 |
| <i>Hadhb</i>                 | Trifunctional enzyme subunit beta, mitochondrial precursor (TP-beta) (Acetyl-CoA acyltransferase) | 1.32                    | 2.43 |
| <i>Cpt1a</i>                 | Carnitine O-palmitoyltransferase I, liver isoform                                                 | 0.99                    | 0.94 |
| <i>Cpt2</i>                  | Carnitine O-palmitoyltransferase 2, mitochondrial precursor                                       | 1.02                    | 0.71 |
| <i>Fabp1</i>                 | Fatty acid binding protein 1, liver                                                               | 1.70                    | 1.80 |
| <i>Pck2</i>                  | Phosphoenolpyruvate carboxykinase 2 (mitochondrial)                                               | 2.08                    | 1.67 |
| <i>Hadh</i>                  | Hydroxyacyl-coenzyme A dehydrogenase, mitochondrial precursor                                     | 1.26                    | 2.32 |
| <i>Acc1</i>                  | Acetyl-CoA carboxylase 1                                                                          | 0.96                    | 0.50 |

**Supplemental Table 1.** Continued

| Gene symbol               | Gene description                                                                        | Group (fold of control) |      |
|---------------------------|-----------------------------------------------------------------------------------------|-------------------------|------|
|                           |                                                                                         | LN                      | FF   |
| <i>Glucose metabolism</i> |                                                                                         |                         |      |
| <i>Pk</i>                 | Pyruvate kinase                                                                         | 0.90                    | 0.77 |
| <i>Gck</i>                | Glucokinase (Hexokinase-4)                                                              | 0.91                    | 0.71 |
| <i>Suclg1</i>             | Succinyl-CoA ligase [GDP-forming] subunit alpha, mitochondrial precursor                | 1.4                     | 2.07 |
| <i>Pfkl</i>               | 6-phosphofructokinase, liver type                                                       | 0.70                    | 0.71 |
| <i>Mdh</i>                | Malate dehydrogenase                                                                    | 1.82                    | 2.73 |
| <i>Sdhb</i>               | Succinate dehydrogenase                                                                 | 1.37                    | 2.39 |
| <i>Suclg2</i>             | Succinyl-CoA ligase [GDP-forming] beta-chain, mitochondrial precursor                   | 1.01                    | 1.02 |
| <i>Idh3b</i>              | Isocitrate dehydrogenase [NAD] subunit beta, mitochondrial precursor                    | 1.16                    | 1.90 |
| <i>Idh2</i>               | Isocitrate dehydrogenase [NADP], mitochondrial precursor (Oxalosuccinate decarboxylase) | 1.06                    | 1.04 |
| <i>Mdh2</i>               | Malate dehydrogenase, mitochondrial precursor                                           | 0.88                    | 0.94 |
| <i>Ogdhl</i>              | Oxoglutarate dehydrogenase-like                                                         | 0.97                    | 0.92 |
| <i>Aco1</i>               | Iron-responsive element-binding protein 1 (IRE-BP 1) (Aconitate hydratase)              | 1.57                    | 0.68 |
| <i>Aco2</i>               | Aconitate hydratase, mitochondrial precursor (Citrate hydrolyase)                       | 1.50                    | 2.76 |
| <i>Pgm1</i>               | Phosphoglucomutase-1                                                                    | 1.52                    | 2.36 |
| <i>Fbp1</i>               | Fructose-1,6-bisphosphatase 1                                                           | 1.20                    | 0.61 |
| <i>Fbp2</i>               | Fructose-1,6-bisphosphatase isozyme 2                                                   | 1.32                    | 0.86 |
| <i>Hkdc1</i>              | Hexokinase domain containing 1                                                          | 0.82                    | 0.95 |

**Supplemental Table 1.** Continued

| Gene symbol                   | Gene description                                                                   | Group (fold of control) |
|-------------------------------|------------------------------------------------------------------------------------|-------------------------|
|                               |                                                                                    | LN                      |
| <i>Cholesterol metabolism</i> |                                                                                    |                         |
| <i>Hsd17b4</i>                | Peroxisomal multifunctional enzyme type 2 (17-beta-hydroxysteroid dehydrogenase 4) | 1.44                    |
| <i>Cyp27a1</i>                | Cytochrome P450 27, mitochondrial precursor                                        | 1.52                    |
| <i>Hsd3b7</i>                 | 3 beta-hydroxysteroid dehydrogenase type 7                                         | 1.49                    |
| <i>Akr1d1</i>                 | 3-oxo-5-beta-steroid 4-dehydrogenase (Aldo-keto reductase family 1 member D1)      | 1.46                    |
| <i>Mcee</i>                   | Methylmalonyl-CoA epimerase, mitochondrial precursor                               | 0.58                    |
| <i>Sqle</i>                   | Squalene monooxygenase                                                             | 1.79                    |
| <i>Dhcr7</i>                  | 7-dehydrocholesterol reductase                                                     | 2.24                    |
| <i>Cel</i>                    | Bile salt-activated lipase precursor (BAL)                                         | 1.35                    |
| <i>Insig2</i>                 | Insulin induced protein 2                                                          | 1.57                    |
| <i>Soat2</i>                  | Sterol O-acyltransferase 2 (Acyl coenzyme A:cholesterol acyltransferase 2)         | 1.21                    |
| <i>Apoa1</i>                  | Apolipoprotein A-I                                                                 | 2.16                    |
| <i>Lipa</i>                   | Lysosomal acid lipase/cholesteryl ester hydrolase precursor                        | 1.56                    |
| <i>Mbtps1</i>                 | Membrane-bound transcription factor site-1 protease precursor (Site-1 protease)    | 0.94                    |
