# Supplementary material
Source: PubMed Central journal article supplement (PMC4031941)
Supplement: supp_M045807_jlr.M045807-2.pdf [file supp_M045807_jlr.M045807-2.pdf]

**Supplemental Table 2.** The top 30 metabolites with high absolute loadings on principal component 1 determined by the principal component analysis

| <b>Metabolite</b>                                      | <b>Loading<sup>1</sup></b> |
|--------------------------------------------------------|----------------------------|
| Borneol                                                | 0.99                       |
| Benzenesulfonamide                                     | 0.99                       |
| Ethanedioic acid                                       | 0.99                       |
| 2-Hexenoic acid                                        | 0.99                       |
| 1-Piperidinecarboxaldehyde                             | 0.96                       |
| D-Erythro-pentofuranose                                | 0.95                       |
| Oleic acid                                             | 0.94                       |
| Ethanedioic acid                                       | 0.94                       |
| Azelaic acid                                           | 0.90                       |
| Palmitelaidic acid                                     | 0.89                       |
| 6-Quinolinamine 1-oxide                                | 0.88                       |
| Lauric acid                                            | 0.88                       |
| Myristic acid                                          | 0.87                       |
| 3-(Chloroethylboryl)-2-(chlorodimethylsilyl)-2-pentene | 0.86                       |
| Benzothiazolinone                                      | 0.84                       |
| Myristic acid                                          | 0.84                       |
| Thionine                                               | 0.84                       |
| Cadaverine                                             | 0.84                       |
| d-Erythrotetrofuranose                                 | 0.83                       |
| Threitol                                               | 0.82                       |
| Octanoic acid                                          | 0.80                       |
| Acetamide                                              | 0.79                       |
| 2-Thiophenecarbothioamide                              | 0.77                       |
| 2-Methyl-2-carboxytetrahydrothiazole                   | 0.74                       |
| 9,12-Octadecadienoic acid                              | 0.73                       |
| Palmitic acid                                          | 0.73                       |
| Methyltyrosine                                         | 0.72                       |
| Methyltris(trimethylsiloxy)silane                      | -0.93                      |
| Ethanedioic acid                                       | -0.85                      |
| Benzoic acid                                           | -0.75                      |

<sup>1</sup>Positive and negative loadings mean increased and decreased concentrations in metabolites of control group compared with those of linalool group, respectively.
