# Supplementary material
Source: PubMed Central journal article supplement (PMC4031941)
Supplement: supp_M045807_jlr.M045807-3.pdf [file supp_M045807_jlr.M045807-3.pdf]

**Supplemental Table 3.** The selected 13 long-chain fatty acid metabolites detected in the plasma of control and linalool-treated mice

| <b>Fatty acid metabolite</b> | <b>Group (ppm)</b> |                 |
|------------------------------|--------------------|-----------------|
|                              | <b>Control</b>     | <b>Linalool</b> |
| Lauric acid (C12:0)          | 12,899             | 8,755           |
| Myristic acid (C14:0)        | 59,076             | 45,770          |
| Pentadecanoic acid (C15:0)   | 22,785             | 14,734          |
| Palmitic acid (C16:0)        | 949,354            | 751,126         |
| Heptadecanoic acid (C17:0)   | 25,643             | 15,479          |
| Stearic acid (C18:0)         | 643,706            | 675,816         |
| Arachidic acid (C20:0)       | 10,546             | 9,034           |
| Docosanoic acid (C22:0)      | 3,489              | 2,502           |
| Tetracosanoic acid (C24:0)   | 12,304             | 5,863           |
| Palmitoleic acid (C16:1)     | 46,673             | 22,087          |
| Oleic acid (C18:1)           | 625,397            | 341,947         |
| Linoleic acid (C18:2)        | 149,144            | 60,884          |
| Arachidonic acid (C20:4)     | 48,757             | 54,022          |
