# Supplementary material
Source: PubMed Central journal article supplement (PMC4031941)
Supplement: supp_M045807_jlr.M045807-4.pdf [file supp_M045807_jlr.M045807-4.pdf]

HepG2 cells

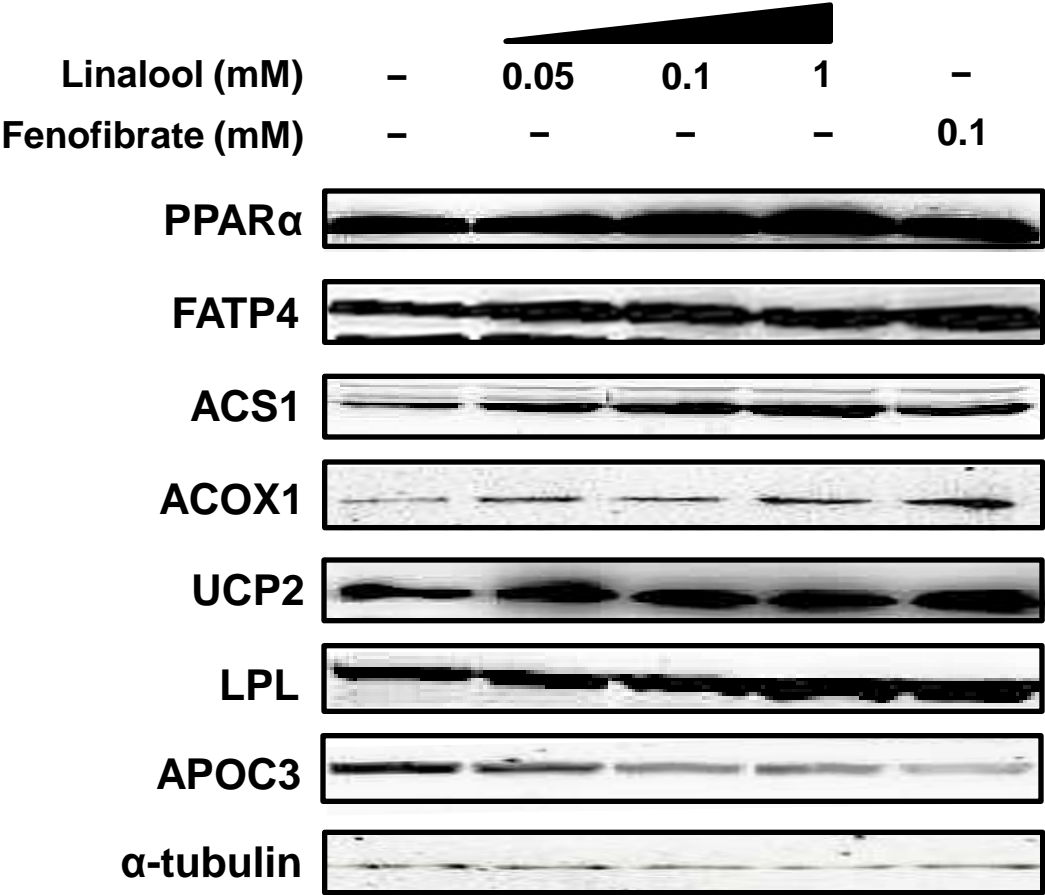

Supplemental Fig. 1. Western blots of PPARα and its targets in HepG2 cells. HepG2 cells were treated with linalool or fenofibrate (0.1 mM) for 24 h.
