# Supplementary material
Source: PubMed Central journal article supplement (PMC4031941)
Supplement: supp_M045807_jlr.M045807-5.pdf [file supp_M045807_jlr.M045807-5.pdf]

# Jun et al. Supplemental Figure 2

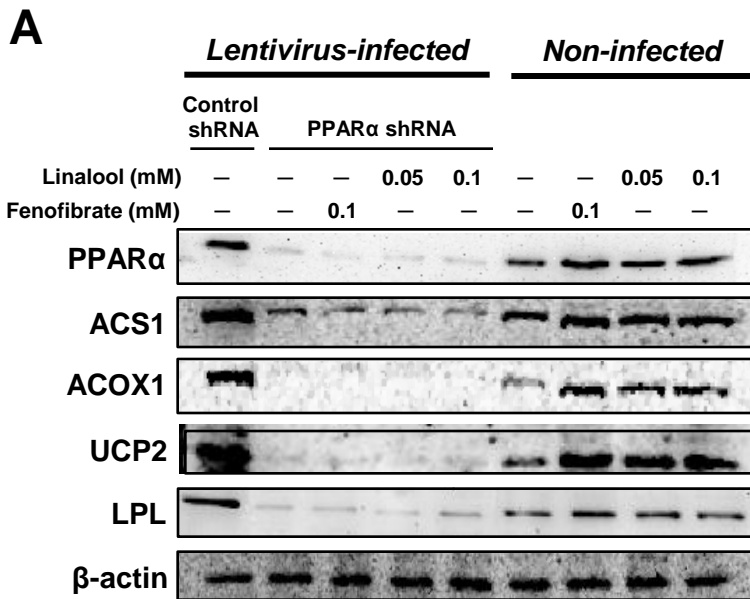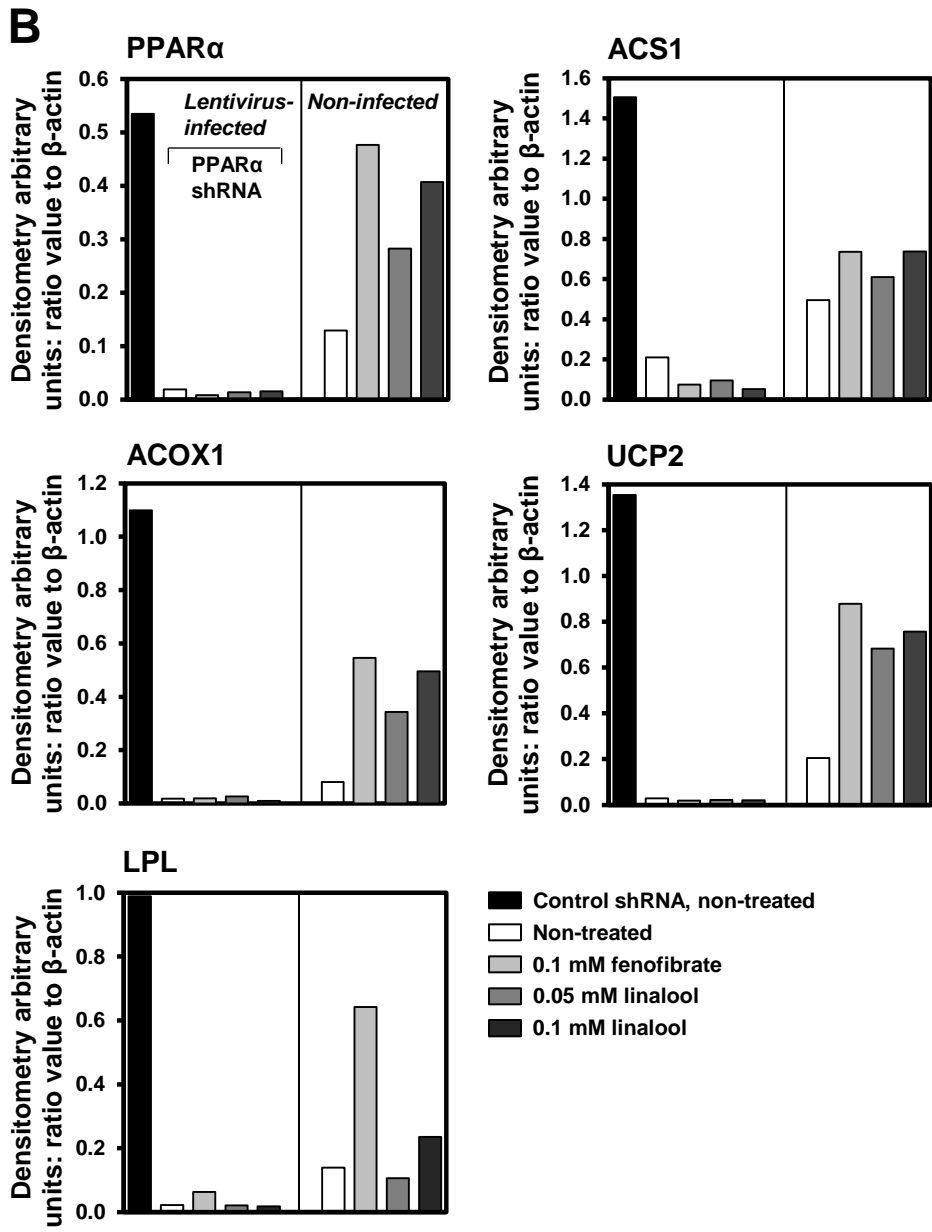

**Supplemental Fig. 2. The PPAR $\alpha$ -targeted mechanism of linalool is reproduced in the PPAR $\alpha$ -knockdown HepG2 cells.** Lentiviral particles were produced by HEK293T cells cotransfected with a lentiviral pGIPZ plasmid carrying PPAR $\alpha$ -selective shRNA, a psPAX2 packaging plasmid, and a pMD2G envelop plasmid, which were then used to infect the HepG2 cells. A, B: The PPAR $\alpha$ -knockdown HepG2 cells generated were treated with linalool or fenofibrate for 24 h, and proteins were then extracted for immunoblotting to examine the protein expression of PPAR $\alpha$  and target genes.
