# Supplementary material
Source: PubMed Central journal article supplement (PMC4031941)
Supplement: supp_M045807_jlr.M045807-6.pdf [file supp_M045807_jlr.M045807-6.pdf]

# Jun et al. Supplemental Figure 3

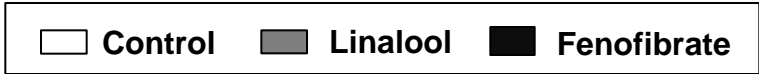

**A** C57BL/6J mice

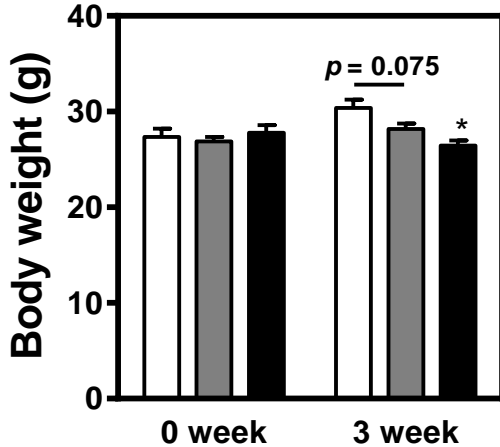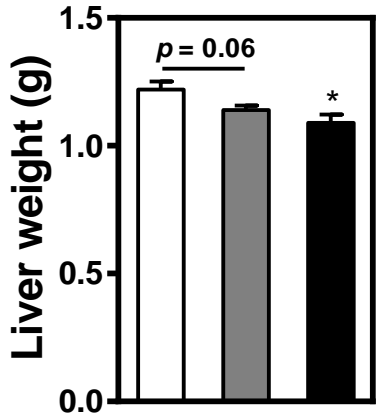

**B** ApoE2 mice

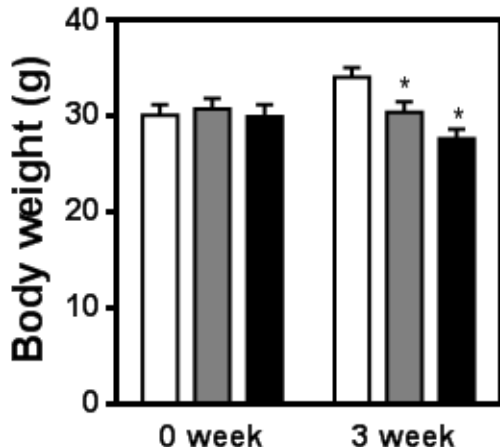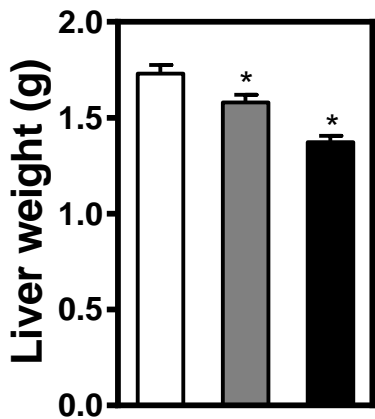

**C** PPARα-deficient mice

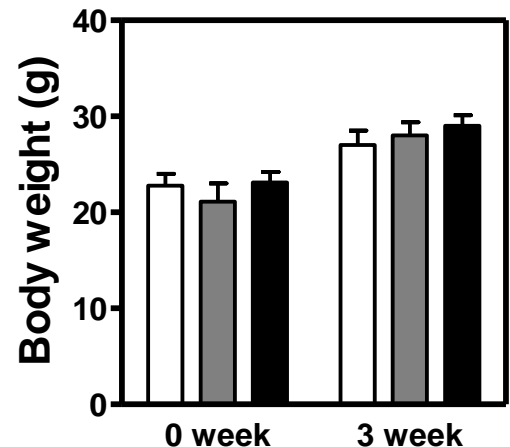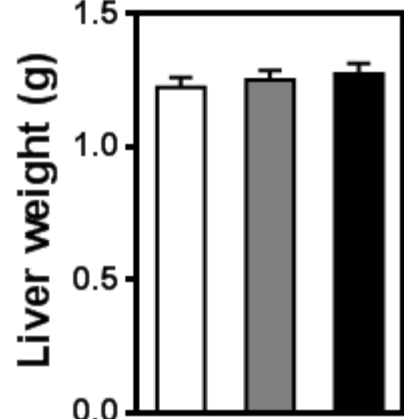

**Supplemental Fig. 3. Body and liver weights of C57BL/6J (A), apoE2 (B), and PPARα-deficient mice (C).** Western diet-fed mice were orally administered with vehicle, linalool (100 mg/kg body weight/day) or fenofibrate (100 mg/kg body weight/day) for 3 weeks. Body weight was measured at 0 and 3 weeks. After the feeding period, mice were sacrificed and liver weight was determined. Data represent means ± SE. \*P < 0.05 versus the control group.
