# Supplementary material
Source: PubMed Central journal article supplement (PMC4031941)
Supplement: supp_M045807_jlr.M045807-7.pdf [file supp_M045807_jlr.M045807-7.pdf]

# Jun et al. Supplemental Figure 4

## A C57BL6J mice

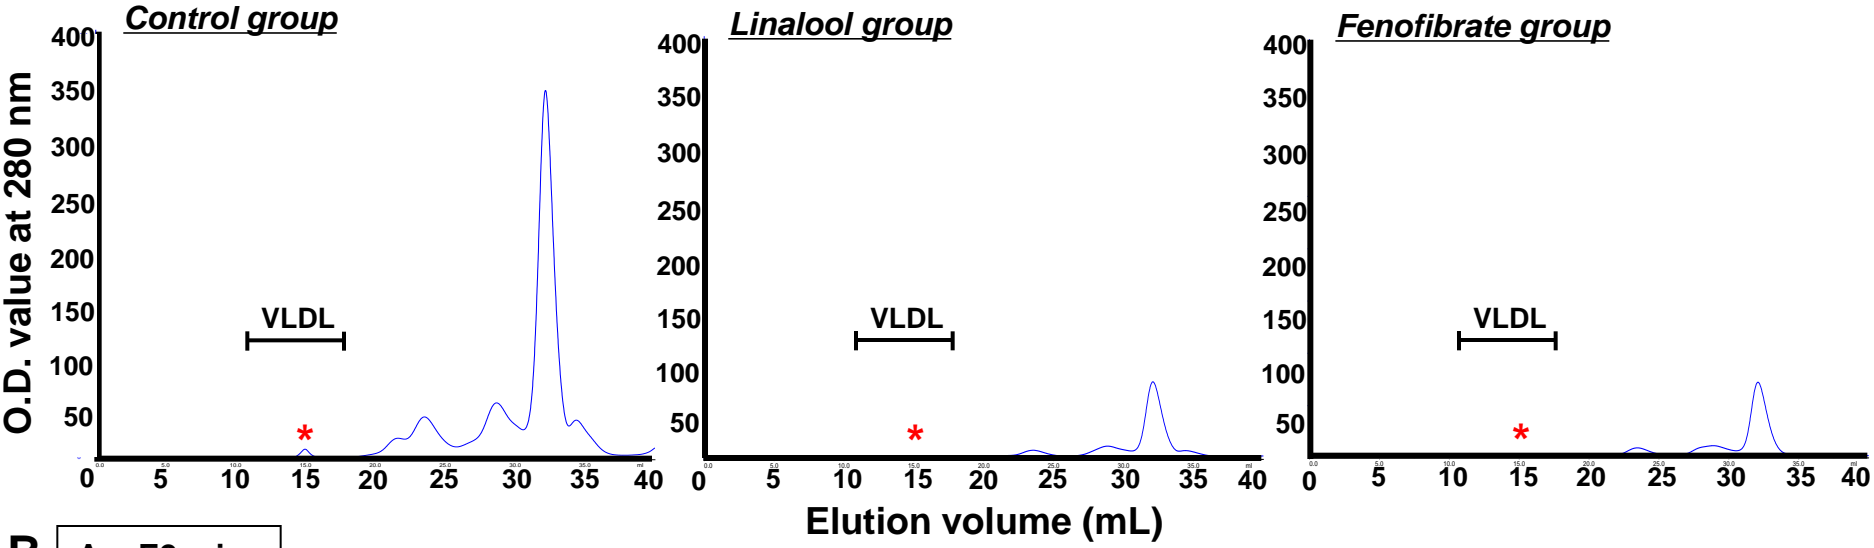

## B ApoE2 mice

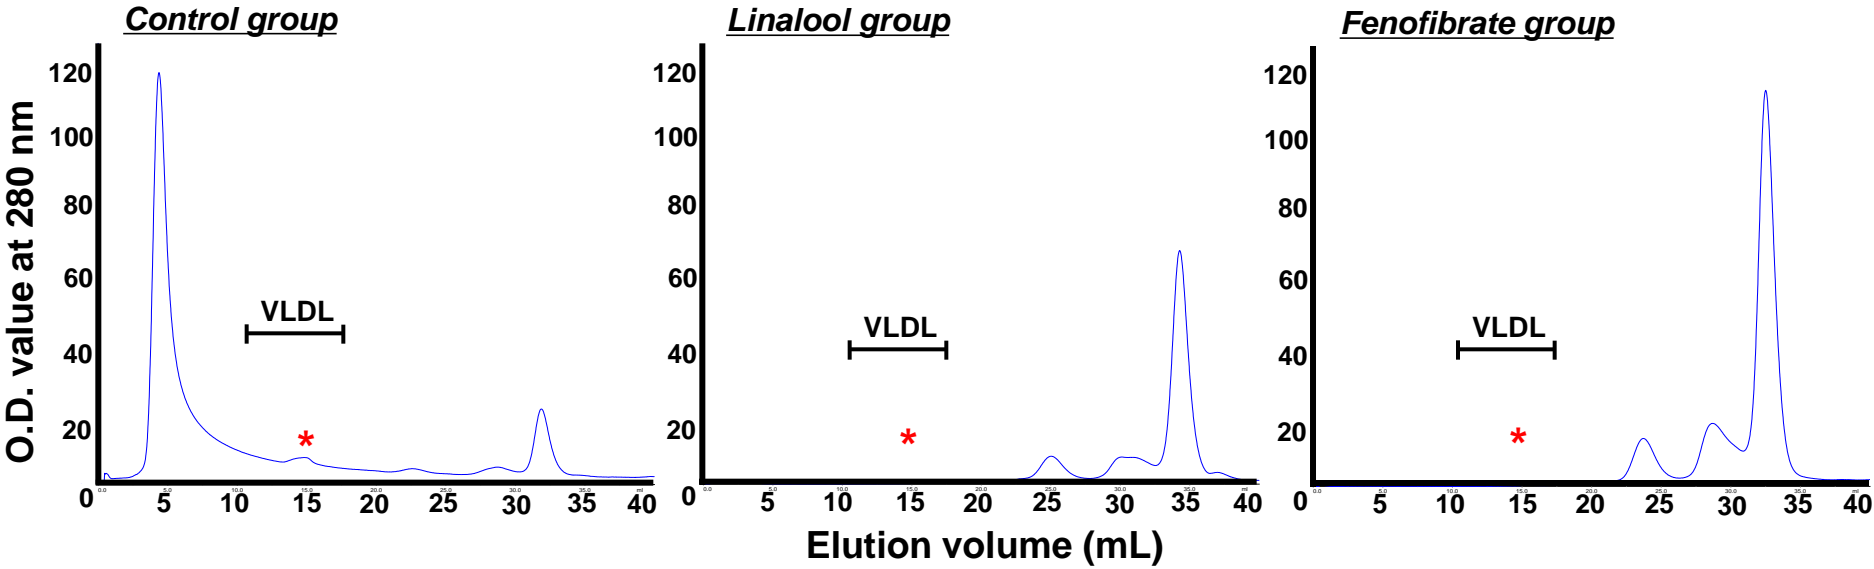

**Supplemental Fig. 4. Lipoprotein profiling analysis by FPLC in the plasma of C57BL/6J (A) and apoE2 mice (B).** Western diet-fed C57BL/6J and apoE2 mice were orally administered with vehicle, linalool (100 mg/kg body weight/day) or fenofibrate (100 mg/kg body weight/day) for 3 weeks. \*VLDL-TG peak.
