# Supplementary material
Source: PubMed Central journal article supplement (PMC4031941)
Supplement: supp_M045807_jlr.M045807-8.pdf [file supp_M045807_jlr.M045807-8.pdf]

# Jun et al. Supplemental Figure 5

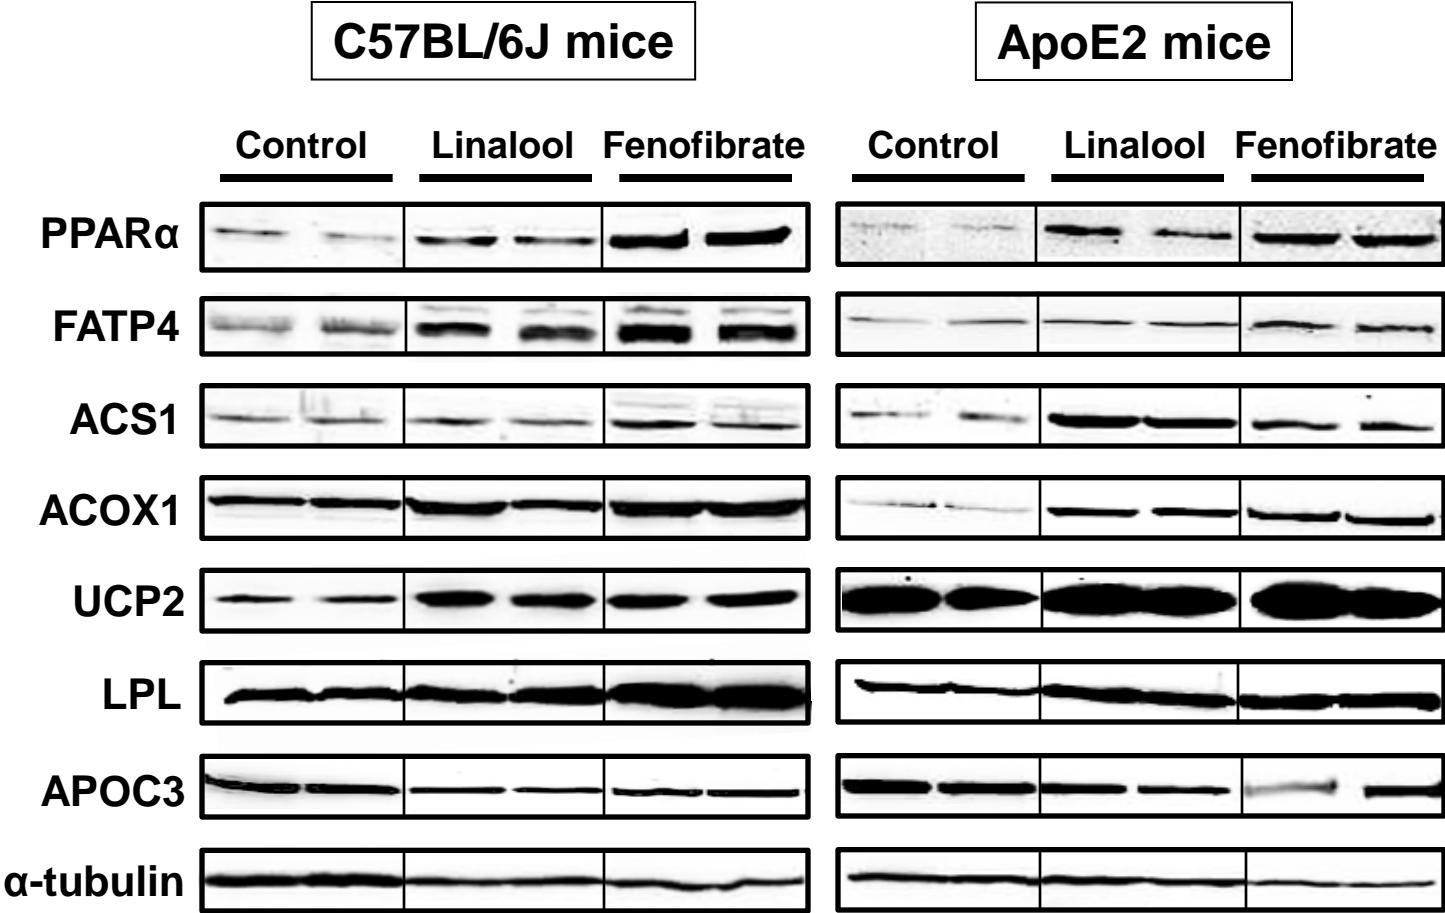

**Supplemental Fig. 5. Western blots of PPARα and its targets in the liver tissues of C57BL/6J and apoE2 mice.** C57BL/6J and apoE2 mice were fed a Western diet supplemented or not (control group) with 100 mg/kg body weight/day linalool or fenofibrate by oral gavage for 3 weeks.
